# Supplementary material
Source: Springer Nature journal article supplement (https://www.springermedizin.de/resource/supplementary/13075_2009_2796_MOESM5_ESM.pdf/9692904)

(a)

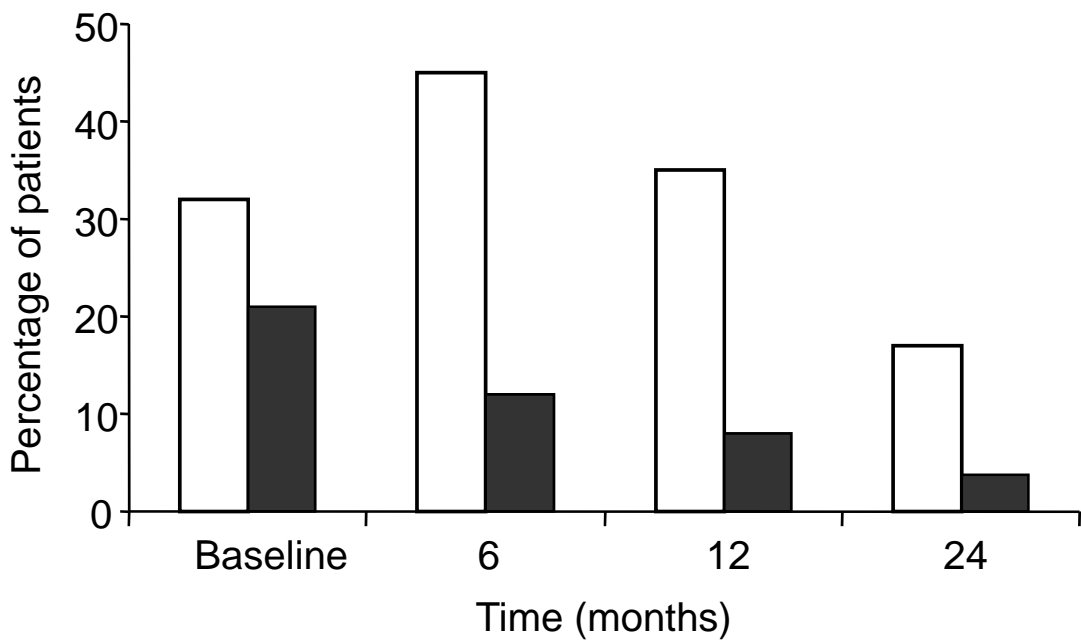

(b)

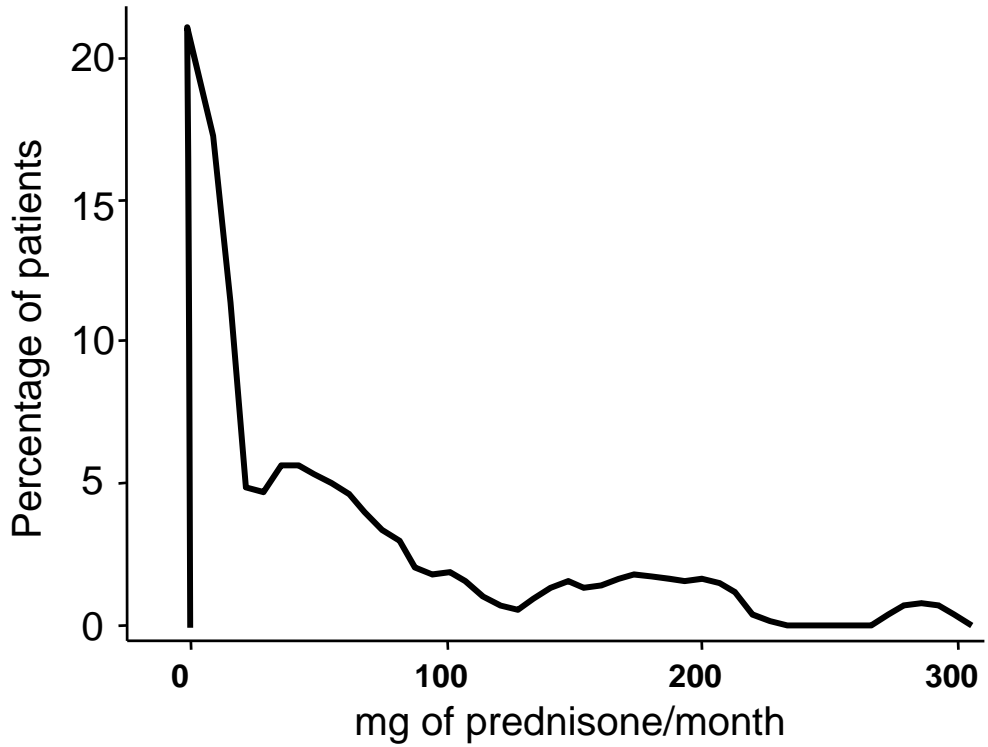

Supplement: MOESM5 [file 9692904]
